# Supplementary material
Source: PubMed Central journal article supplement (PMC4008491)
Supplement: NIHMS571062-supplement-Supp_figureS1-4_tableS1.pdf [file NIHMS571062-supplement-Supp_figureS1-4_tableS1.pdf]

**Supporting Information for:**

**Stringent Response Processes Suppress DNA Damage Sensitivity Caused by  
Deficiency in Full-Length Translation Initiation Factor 2 or PriA Helicase**

K. Elizabeth Madison, Erica N. Jones-Foster, Andrea Vogt, Sandra Kirtland Turner, Stella H.  
North, and Hiroshi Nakai\*

Department of Biochemistry and Molecular & Cellular Biology, Georgetown University Medical  
Center, Box 571455, 3900 Reservoir Rd. NW, Washington, DC 20057-1455, USA

\*Corresponding author.

E-mail: [nakaih@georgetown.edu](mailto:nakaih@georgetown.edu)

Telephone: 1 (202) 687-1442

FAX: 1 (202) 687-7186

## SI Figures

### A natural *infB*(wt)

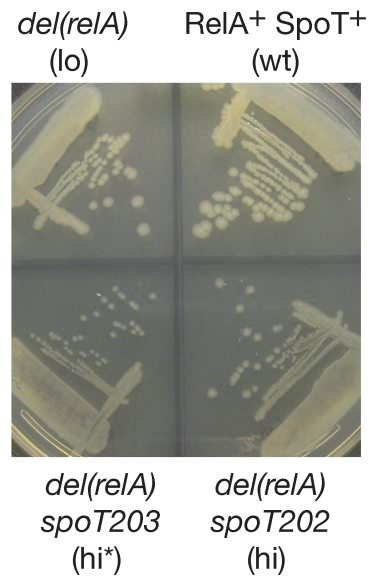

### B natural *infB*(wt) *del*(*priB*)

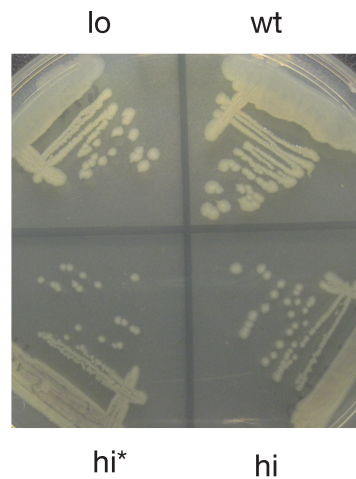

### C <*infB*(wt)> *del*(*infB*)::tet

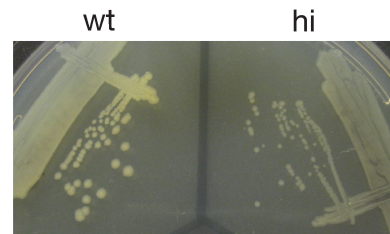

### D <*infB*(*del2/3*)> *del*(*infB*)::tet

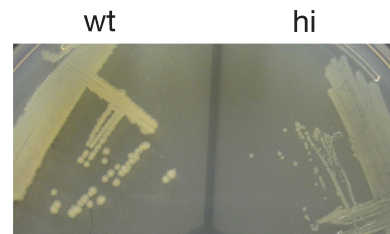

### E <*infB*(*del1*)> *del*(*infB*)::tet

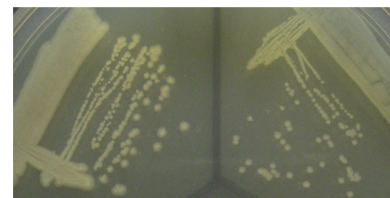

### F *priA300*, natural *infB*(wt)

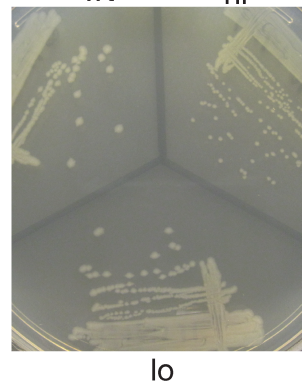

Figure S1. **Effect of the various alleles affecting ppGpp levels on colony size.**

A. Effect of the lo to hi\* ppGpp background for a strain with wild-type *infB* and restart functions. Strains were streaked out on LB plates and incubated at 37°C for 20-24 h. The specific strains are (clockwise from lo, upper left): GTN701, GTN932, GTN722, GTN723.

- B. Effect on a *del(priB)* strain. The strains are (clockwise from lo, upper left): GTN700, GTN394, GTN724, GTN726.
- C. The *<infB(wt)>* strain at wt and hi ppGpp. The strains are GTN1050 and GTN1703, respectively.
- D. The *<infB(del2/3)>* strain at wt and hi ppGpp. Strains: GTN1115 and GTN1705, respectively.
- E. The *<infB(del1)>* strain at wt and hi ppGpp. Strains: GTN1114 and GTN1704, respectively.
- F. The *priA300* strain at lo to hi ppGpp. Strains: GTN1713, GTN381, and GTN1717, respectively.

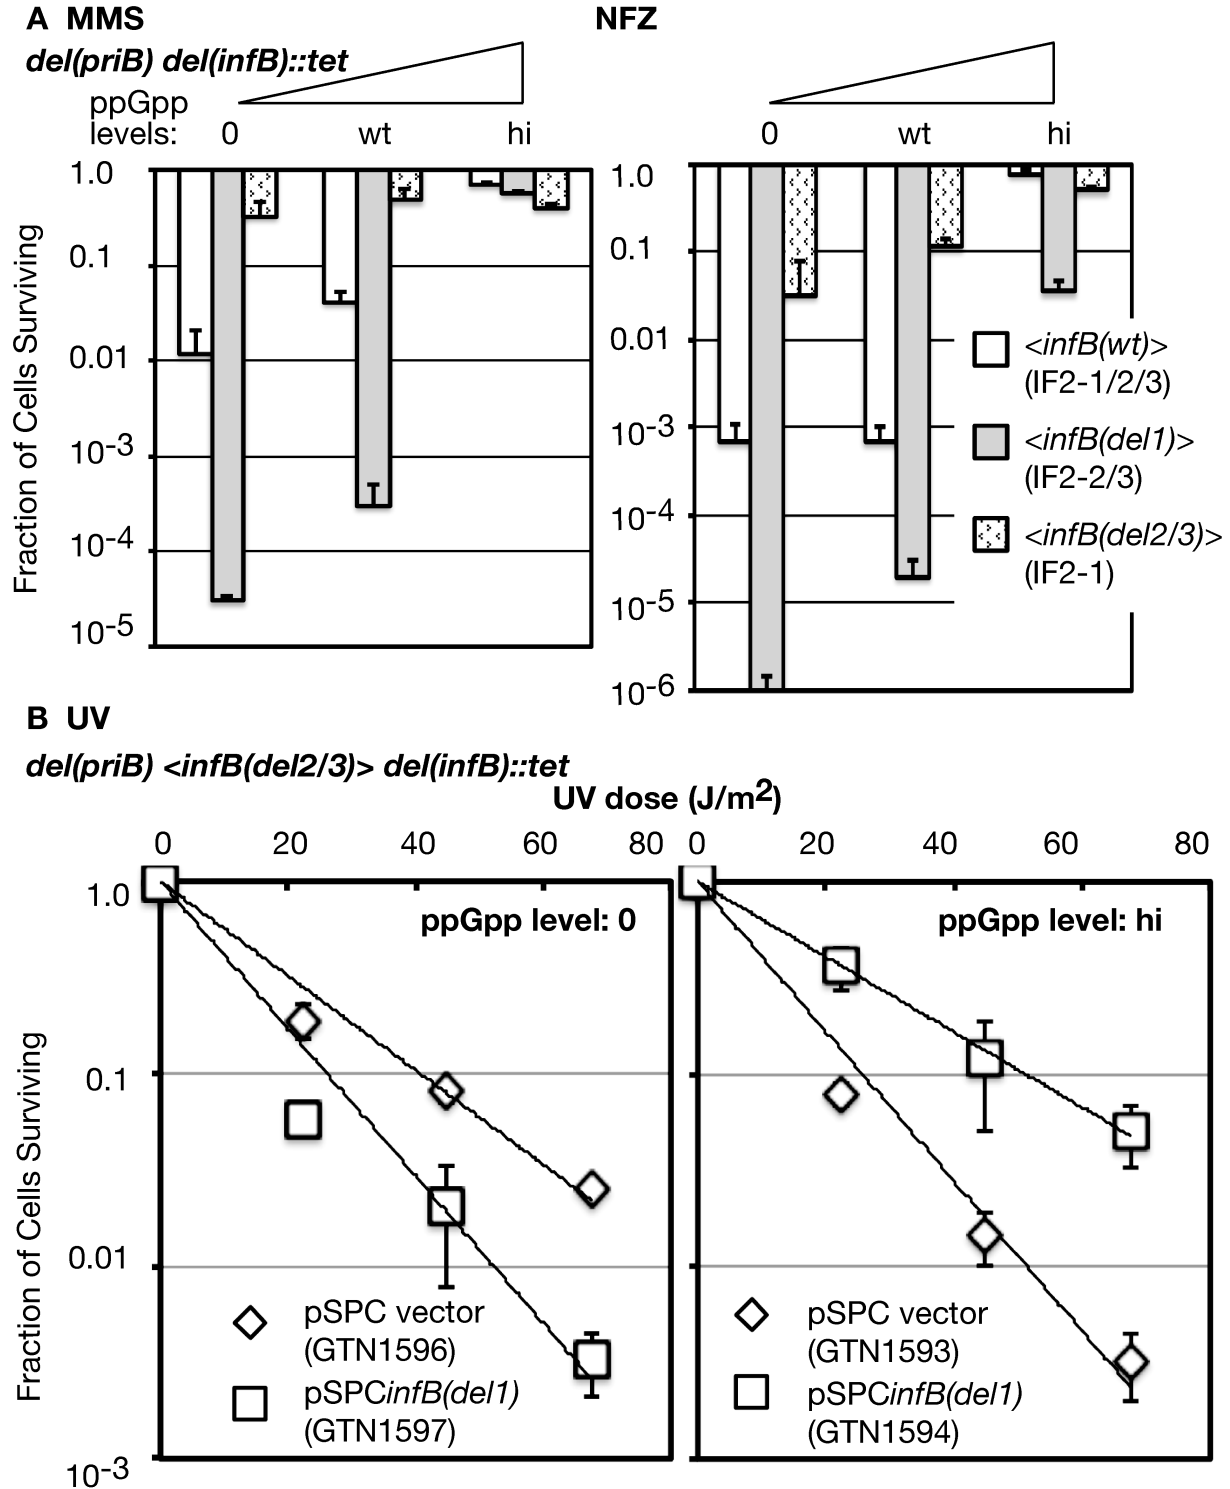

Figure S2. The effect of ppGpp on DNA-damage sensitivity of  $del(priB)$  strains expressing IF2-1 and IF2-2/3.

A. MMS and NFZ sensitivity. Survival of the various  $<infB> del(priB)$  strains with the indicated ppGpp background is shown. In the legend the IF2 isoforms expressed by each  $<infB>$

allele are indicated in parenthesis. The specific strains, listed in ascending ppGpp order for each group, are *<infB(wt)> del(priB)*: GTN1498, GTN1122, GTN1502; *<infB(del1)> del(priB)*: GTN1537, GTN1117, GTN1503; *<infB(del2/3)> del(priB)*: GTN1499, GTN1119, GTN1505.

B. UV sensitivity. Complementation of the *<infB(del2/3)* strain with pSPC*infB(del1)*. The pSPC*infB(del1)* expresses IF2-2/3 while the single copy *<infB(del2/3)* allele expresses IF2-1. The pSPC vector (diamonds) refers to the empty plasmid vector, the strain having only the single-copy *<infB(del2/3)* allele.

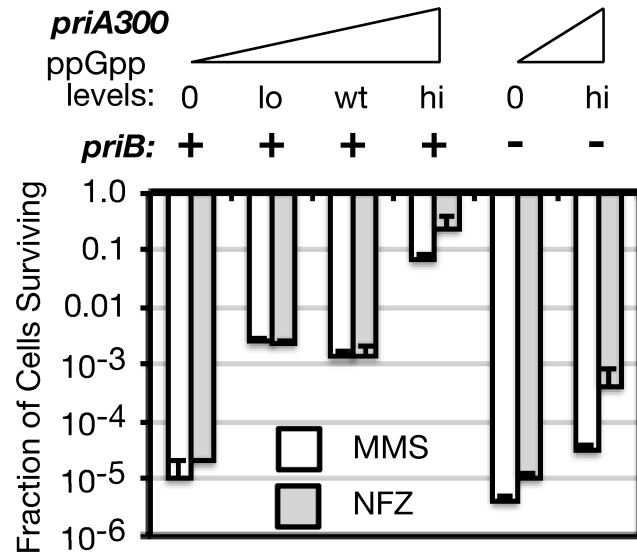

Figure S3. **MMS and NFZ sensitivity of the *priA300* mutant at various ppGpp levels.** The strains have the indicated ppGpp background and are *PriB*<sup>+</sup> (+) or *del(priB)* (-). The results of examining MMS sensitivity of the *priA300* *PriB*<sup>+</sup> strains are the same as shown in Figure 5A and are included for comparison. The strains used are from left to right: GTN1867, GTN1713, GTN381, GTN1717, GTN1789, GTN1811.

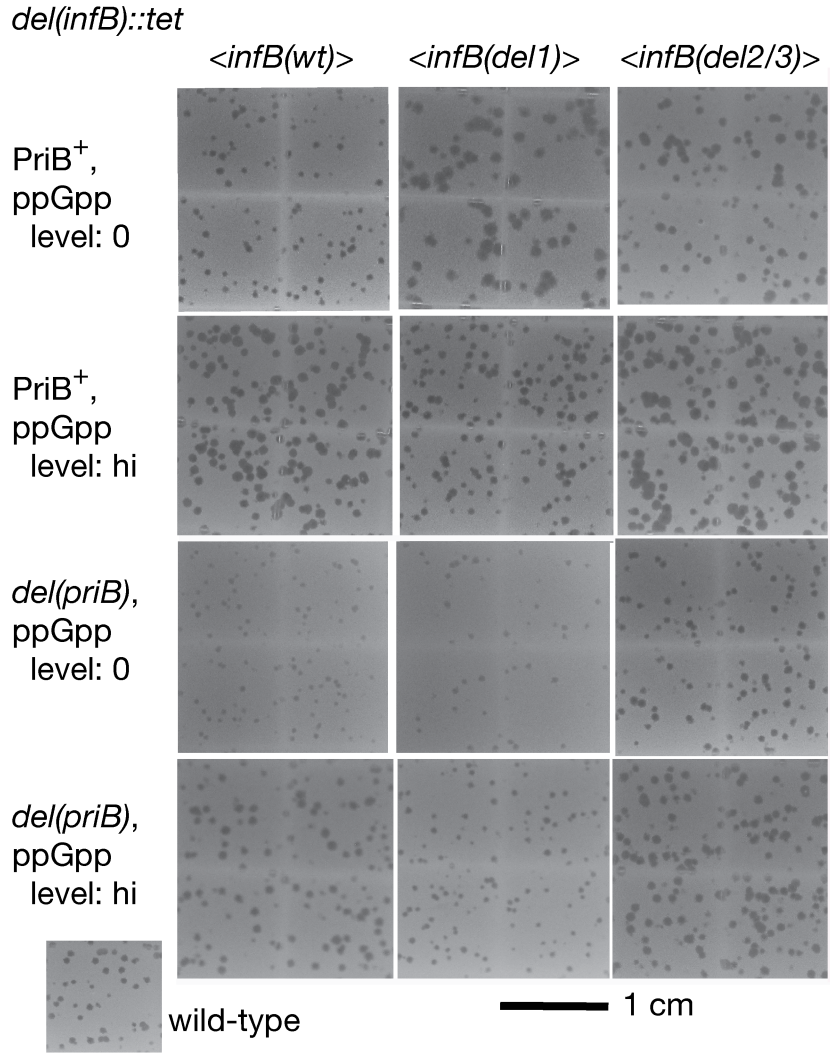

**Figure S4. Expression of IF2-1 or IF2-2/3 alone and their effect on Mu replication in the PriB<sup>+</sup> and *del(priB)* genetic backgrounds.** The effect of the *infB* alleles on the formation of Mu plaques at 0 and high ppGpp levels is shown. Approximately 4000 plaque-forming units of Mu were plated with the bacterial strains on a 100 x 15 mm petri plate, which was incubated overnight at 37°C. The specific indicator strains used (listed in ascending ppGpp order for each group) are PriB<sup>+</sup> ppGpp0: GTN1700, GTN1701, GTN1702; PriB<sup>+</sup> ppGpp hi: GTN1703, GTN1704, GTN1705; *del(priB)* ppGpp0: GTN1498, GTN1537, GTN1499; *del(priB)* ppGpp hi: GTN1502, GTN1503, GTN1505. The strain indicated as wild-type is GTN932, the standard strain used to titer Mu. The bar is a reference for 1 cm length.

Table S1. *Escherichia coli* strains.

| Strain                                                           | Relevant genotypes                         | Source                                               |
|------------------------------------------------------------------|--------------------------------------------|------------------------------------------------------|
| <b>Sources of mutant alleles:</b>                                |                                            |                                                      |
| CF1693 <sup>a</sup>                                              | <i>del(relA)251::kan del(spoT)207::cat</i> | M. Cashel<br>(Xiao <i>et al.</i> ,<br>1991)          |
| CF10237 <sup>b</sup>                                             | <i>del(relA)256 del(spoT)212</i>           | M. Cashel<br>(Harinarayanan<br><i>et al.</i> , 2008) |
| CF12271 <sup>c</sup>                                             | <i>del(relA)256 spoT202 zib563::Tn10</i>   | M. Cashel<br>(Sarubbi <i>et al.</i> ,<br>1988)       |
| CF12275 <sup>c</sup>                                             | <i>del(relA)256 spoT203 zib563::Tn10</i>   | M. Cashel<br>(Sarubbi <i>et al.</i> ,<br>1988)       |
| CF5834 <sup>d</sup>                                              | <i>pyrE60 zib563::Tn10</i>                 | M. Cashel                                            |
| NK5992 <sup>e</sup>                                              | <i>argA81::Tn10</i>                        | CGSC <sup>f</sup>                                    |
| SS97 <sup>g</sup>                                                | <i>priA300 sulA::Mud(lac,Ap,B::Tn9)</i>    | S. Sandler<br>(Sandler, 2000)                        |
| JC19272 <sup>h</sup>                                             | <i>del(priB)302 priC303::kan dnaC809</i>   | S. Sandler<br>(Sandler <i>et al.</i> ,<br>1999)      |
| JW0456-1 <sup>i</sup>                                            | <i>del(priC)752::kan</i>                   | CGSC (Baba <i>et al.</i> , 2006)                     |
| JW3140-5 <sup>j</sup>                                            | <i>del(argG)781::kan</i>                   | CGSC (Baba <i>et al.</i> , 2006)                     |
| <b>GTN932 constructs with the natural <i>infB(wt)</i> locus:</b> |                                            |                                                      |
| GTN932                                                           | <i>del(gpt-lac)5</i>                       | (Madison <i>et al.</i> ,<br>2012)                    |
| GTN381                                                           | GTN932 <i>priA300</i>                      | (Madison <i>et al.</i> ,<br>2012)                    |
| GTN387                                                           | GTN932 <i>priC303::kan</i>                 | (GTN932) <sup>k,l</sup>                              |
| GTN394                                                           | GTN932 <i>del(priB)302</i>                 | (Madison <i>et al.</i> ,<br>2012)                    |

|                                                                             |                                                                         |                                |
|-----------------------------------------------------------------------------|-------------------------------------------------------------------------|--------------------------------|
| GTN699                                                                      | GTN932 <i>priC303::kan del(relA)256</i>                                 | (GTN387) <sup>m</sup>          |
| GTN700                                                                      | GTN932 <i>del(priB)302 del(relA)256</i>                                 | (GTN394) <sup>m</sup>          |
| GTN701                                                                      | GTN932 <i>del(relA)256</i>                                              | (GTN932) <sup>m</sup>          |
| GTN702                                                                      | GTN932 <i>priC303::kan del(relA)256 del(spoT)207::cat</i>               | (GTN699) <sup>n</sup>          |
| GTN703                                                                      | GTN932 <i>del(priB)302 del(relA)256 del(spoT)207::cat</i>               | (GTN700) <sup>n</sup>          |
| GTN704                                                                      | GTN932 <i>del(relA)256 del(spoT)207::cat</i>                            | (GTN701) <sup>n</sup>          |
| GTN722                                                                      | GTN932 <i>del(relA)256 spoT202 zib563::Tn10</i>                         | (GTN704) <sup>o</sup>          |
| GTN723                                                                      | GTN932 <i>del(relA)256 spoT203 zib563::Tn10</i>                         | (GTN704) <sup>o</sup>          |
| GTN724                                                                      | GTN932 <i>del(priB)302 del(relA)256 spoT202 zib563::Tn10</i>            | (GTN703) <sup>o</sup>          |
| GTN726                                                                      | GTN932 <i>del(priB)302 del(relA)256 spoT203 zib563::Tn10</i>            | (GTN703) <sup>o</sup>          |
| GTN1486                                                                     | GTN932 <i>pBAD43 del(priB)302 del(relA)256 del(spoT)207::cat</i>        | (GTN703) <sup>p</sup>          |
| GTN1487                                                                     | GTN932 <i>pBAD43 del(priB)302 del(relA)256 spoT202 zib563::Tn10</i>     | (GTN724) <sup>p</sup>          |
| GTN1613                                                                     | GTN932 <i>priA300 del(relA)251::kan</i>                                 | (GTN381) <sup>q</sup>          |
| GTN1617                                                                     | GTN932 <i>priA300 del(relA)251::kan spoT202 zib563::Tn10</i>            | (GTN1613) <sup>o</sup>         |
| GTN1713                                                                     | GTN932 <i>priA300 del(relA)256</i>                                      | (GTN701) <sup>r</sup>          |
| GTN1717                                                                     | GTN932 <i>priA300 del(relA)256 spoT202 zib563::Tn10</i>                 | (GTN1713) <sup>o</sup>         |
| GTN1765                                                                     | GTN932 <i>del(priC)752::kan del(relA)256 spoT202 zib563::Tn10</i>       | (GTN722) <sup>s</sup>          |
| GTN1789                                                                     | GTN932 <i>priA300 del(priB)302 del(relA)256</i>                         | (GTN1713) <sup>t</sup>         |
| GTN1811                                                                     | GTN932 <i>priA300 del(priB)302 del(relA)256 spoT202 zib563::Tn10</i>    | (GTN1717) <sup>t</sup>         |
| GTN1821                                                                     | GTN932 <i>del(priC)752::kan</i>                                         | (GTN932) <sup>s</sup>          |
| GTN1829                                                                     | GTN932 <i>del(relA)256 del(priC)752::kan</i>                            | (GTN701) <sup>s</sup>          |
| GTN1867                                                                     | GTN932 <i>priA300 del(relA)256 del(spoT)207::cat</i>                    | (GTN1713) <sup>n</sup>         |
| GTN1872                                                                     | GTN932 <i>del(priC)752::kan del(relA)256 spoT203 zib563::Tn10</i>       | (GTN723) <sup>s</sup>          |
| GTN1896                                                                     | GTN932 <i>del(priC)752::kan del(relA)256 del(spoT)207::cat</i>          | (GTN704) <sup>s</sup>          |
| <b>GTN932 &lt;nusAinfB(wt)cat&gt; del(infB)1::tet (GTN1050) constructs:</b> |                                                                         |                                |
| GTN1050                                                                     | GTN932 <nusAinfB(wt)cat> del(infB)1::tet                                | (Madison <i>et al.</i> , 2012) |
| GTN1122                                                                     | GTN1050 <i>del(priB)302</i>                                             | (GTN394) <sup>u</sup>          |
| GTN1298                                                                     | GTN1050 <i>priA300</i>                                                  | (Madison <i>et al.</i> , 2012) |
| GTN1461                                                                     | GTN1050 <i>del(argG)781::kan</i>                                        | (GTN1050) <sup>v</sup>         |
| GTN1498                                                                     | GTN1050 <i>del(priB)302 del(relA)256 del(spoT)212 del(argG)781::kan</i> | (GTN703) <sup>w</sup>          |

|                                                                                 |                                                                                                    |                                |
|---------------------------------------------------------------------------------|----------------------------------------------------------------------------------------------------|--------------------------------|
| GTN1502                                                                         | GTN1050 <i>del(priB)302 del(relA)256 spoT202 del(argG)781::kan zib563::Tn10</i>                    | (GTN724) <sup>x</sup>          |
| GTN1700                                                                         | GTN1050 <i>del(relA)256 del(spoT)212 del(argG)781::kan</i>                                         | (GTN704) <sup>w</sup>          |
| GTN1703                                                                         | GTN1050 <i>del(relA)256 spoT202 del(argG)781::kan zib563::Tn10</i>                                 | (GTN722) <sup>x</sup>          |
| <b>GTN932 &lt;nusAinfB(del1)cat&gt; del(infB)1::tet (GTN1114 constructs):</b>   |                                                                                                    |                                |
| GTN1114                                                                         | GTN932 <nusAinfB(del1)cat> <i>del(infB)1::tet</i>                                                  | (Madison <i>et al.</i> , 2012) |
| GTN1117                                                                         | GTN1114 <i>del(priB)302</i>                                                                        | (Madison <i>et al.</i> , 2012) |
| GTN1323                                                                         | GTN1114 <i>priA300</i>                                                                             | (Madison <i>et al.</i> , 2012) |
| GTN1503                                                                         | GTN1114 <i>del(priB)302 del(relA)256 spoT202 del(argG)781::kan zib563::Tn10</i>                    | (GTN724) <sup>x</sup>          |
| GTN1537                                                                         | GTN1114 <i>del(priB)302 del(relA)256 del(spoT)212 del(argG)781::kan</i>                            | (GTN703) <sup>w</sup>          |
| GTN1701                                                                         | GTN1114 <i>del(relA)256 del(spoT)212 del(argG)781::kan</i>                                         | (GTN704) <sup>w</sup>          |
| GTN1704                                                                         | GTN1114 <i>del(relA)256 spoT202 del(argG)781::kan zib563::Tn10</i>                                 | (GTN722) <sup>y</sup>          |
| GTN1714                                                                         | GTN1114 <i>priA300 del(relA)251::kan</i>                                                           | (GTN1323) <sup>q</sup>         |
| <b>GTN932 &lt;nusAinfB(del2/3)cat&gt; del(infB)1::tet (GTN1115) constructs:</b> |                                                                                                    |                                |
| GTN1115                                                                         | GTN932 <nusAinfB(del2/3)cat> <i>del(infB)1::tet</i>                                                | (Madison <i>et al.</i> , 2012) |
| GTN1119                                                                         | GTN1115 <i>del(priB)302</i>                                                                        | (Madison <i>et al.</i> , 2012) |
| GTN1297                                                                         | GTN1115 <i>priA300</i>                                                                             | (Madison <i>et al.</i> , 2012) |
| GTN1499                                                                         | GTN1115 <i>del(priB)302 del(relA)256 del(spoT)212 del(argG)781::kan</i>                            | (GTN703) <sup>w</sup>          |
| GTN1505                                                                         | GTN1115 <i>del(priB)302 del(relA)256 spoT202 del(argG)781::kan zib563::Tn10</i>                    | (GTN724) <sup>y</sup>          |
| GTN1593                                                                         | GTN1115 pBAD43 <i>del(priB)302 del(relA)256 spoT202 del(argG)781::kan zib563::Tn10</i>             | (GTN1505) <sup>p</sup>         |
| GTN1594                                                                         | GTN1115 pSPCnusAinfB(del1) <i>del(priB)302 del(relA)256 spoT202 del(argG)781::kan zib563::Tn10</i> | (GTN1505) <sup>p</sup>         |

|         |                                                                                                               |                        |
|---------|---------------------------------------------------------------------------------------------------------------|------------------------|
| GTN1596 | GTN1115 pBAD43 <i>del(priB)302</i><br><i>del(relA)256 del(spoT)212 del(argG)781::kan</i>                      | (GTN1499) <sup>p</sup> |
| GTN1597 | GTN1115 pSPCnusAinfB( <i>del1</i> ) <i>del(priB)302</i><br><i>del(relA)256 del(spoT)212 del(argG)781::kan</i> | (GTN1499) <sup>p</sup> |
| GTN1702 | GTN1115 <i>del(relA)256 del(spoT)212 del(argG)781::kan</i>                                                    | (GTN704) <sup>w</sup>  |
| GTN1705 | GTN1115 <i>del(relA)256 spoT202 del(argG)781::kan</i>                                                         | (GTN722) <sup>y</sup>  |
| GTN1711 | GTN1115 <i>priA300 del(relA)251::kan</i>                                                                      | (GTN1297) <sup>q</sup> |

**GTN932 pSPCnusAinfB(wt, *del1*, or *del2/3*) *del(infB)1::tet del(priB)302* constructs:**

|         |                                                                                                                           |                       |
|---------|---------------------------------------------------------------------------------------------------------------------------|-----------------------|
| GTN1466 | GTN932 pSPCnusAinfB(wt) <i>del(infB)1::tet del(priB)302</i><br><i>del(relA)256 spoT202 del(argG)781::kan zib563::Tn10</i> | (GTN724) <sup>z</sup> |
| GTN1480 | GTN932 pSPCnusAinfB(wt) <i>del(infB)1::tet del(priB)302</i><br><i>del(relA)256 del(spoT)207::cat del(argG)781::kan</i>    | (GTN703) <sup>z</sup> |
| GTN1539 | GTN1480 but with pSPCnusAinfB( <i>del2/3</i> )                                                                            | (GTN703) <sup>z</sup> |
| GTN1541 | GTN1466 but with pSPCnusAinfB( <i>del1</i> )                                                                              | (GTN724) <sup>z</sup> |
| GTN1543 | GTN1466 but with pSPCnusAinfB( <i>del2/3</i> )                                                                            | (GTN724) <sup>z</sup> |
| GTN1610 | GTN1480 but with pSPCnusAinfB( <i>del1</i> )                                                                              | (GTN703) <sup>z</sup> |

**GTN932 pSPCnusAinfB(*del1*, or *del2/3*) *del(infB)1::tet (PriB<sup>+</sup>)* constructs:**

|         |                                                                                                                         |                       |
|---------|-------------------------------------------------------------------------------------------------------------------------|-----------------------|
| GTN1675 | GTN932 pSPCnusAinfB( <i>del2/3</i> ) <i>del(infB)1::tet</i><br><i>del(relA)256 del(spoT)207::cat del(argG)781::kan</i>  | (GTN704) <sup>z</sup> |
| GTN1679 | GTN932 pSPCnusAinfB( <i>del1</i> ) <i>del(infB)1::tet</i><br><i>del(relA)256 spoT202 del(argG)781::kan zib563::Tn10</i> | (GTN722) <sup>z</sup> |
| GTN1681 | GTN1679 but with pSPCnusAinfB( <i>del2/3</i> )                                                                          | (GTN722) <sup>z</sup> |
| GTN1698 | GTN1675 but with pSPCnusAinfB( <i>del1</i> )                                                                            | (GTN704) <sup>z</sup> |
| GTN1943 | GTN932 pSPCnusAinfB( <i>del1</i> ) <i>del(infB)1::tet</i><br><i>del(relA)256 del(argG)781::kan</i>                      | (GTN701) <sup>z</sup> |
| GTN1957 | GTN1943 but with pSPCnusAinfB( <i>del2/3</i> )                                                                          | (GTN701) <sup>z</sup> |

**GTN932 pSPCnusAinfB(*del1*, or *del2/3*) *del(infB)1::tet priA300 del(relA)256* constructs:**

|         |                                                                                                              |                        |
|---------|--------------------------------------------------------------------------------------------------------------|------------------------|
| GTN1757 | GTN932 pSPCnusAinfB( <i>del2/3</i> ) <i>del(infB)1::tet</i><br><i>priA300 del(relA)256 del(argG)781::kan</i> | (GTN1713) <sup>z</sup> |
| GTN1759 | GTN1757 <i>spoT202 zib563::Tn10</i>                                                                          | (GTN1717) <sup>z</sup> |
| GTN1800 | GTN1757 <i>del(spoT)207::cat</i>                                                                             | (GTN1759) <sup>n</sup> |
| GTN1856 | GTN1759 but with pSPCnusAinfB( <i>del1</i> )                                                                 | (GTN1717) <sup>z</sup> |
| GTN1858 | GTN1757 but with pSPCnusAinfB( <i>del1</i> )                                                                 | (GTN1713) <sup>z</sup> |
| GTN1860 | GTN1800 but with pSPCnusAinfB( <i>del1</i> )                                                                 | (GTN1858) <sup>n</sup> |

- <sup>a</sup> Source of *relA* and *spoT* deletions linked to kanamycin and chloramphenicol resistance, respectively.
- <sup>b</sup> Source of markerless *relA* and *spoT* deletions introduced into strains by P1 transduction (see Notes d and e)
- <sup>c</sup> Source of the *spoT202* or *spoT203* allele, introduced into strains by co-transduction with the tetracycline resistance marker (*zib563::Tn10*).
- <sup>d</sup> Source of the *pyrE60* allele, introduced into strains by co-transduction with tetracycline resistance. This was in preparation for introduction of the *del(spoT212)* allele from CF10237 by co-transduction with *pyrE*<sup>+</sup>. (Tetracycline-sensitive constructs were chosen for use.)
- <sup>e</sup> Source of the *argA81* allele, introduced into strains by co-transduction with tetracycline resistance. This was in preparation for introduction of the *del(relA)* allele from CF10237 by co-transduction with *argA*<sup>+</sup>.
- <sup>f</sup> The Coli Genetic Stock Center, Yale University
- <sup>g</sup> Source of the *priA300* allele, introduced into strains as previously described (Madison *et al.*, 2012).
- <sup>h</sup> Source of *priC303::kan* and the markerless *del(priB)302* alleles introduced into strains as previously described (Madison *et al.*, 2012).
- <sup>i</sup> Source of the *del(priC)752::kan* allele, introduced by P1 transduction.
- <sup>j</sup> The source of the *del(argG)781::kan* allele, used for introduction of the *del(infB)1::tet* allele, whose tetracycline resistance is not sufficiently robust for efficient direct selection. The *infB* knockout was introduced either by co-transduction with *argG*<sup>+</sup> to a *del(argG)781::kan* strain or by co-transduction with *del(argG)781::kan*, selecting for kanamycin resistance.
- <sup>k</sup> The parent strain that is the recipient strain for P1 transductions or for transformation with a plasmid is indicated in parenthesis.
- <sup>l</sup> P1 transduction of the *priC303::kan* allele from JC19272, selecting for kanamycin resistance.
- <sup>m</sup> The markerless *del(relA)256* allele was introduced into strains by first transducing the *argA81::Tn10* from NK5992, selecting for tetracycline resistance. The resulting strain was transduced to ArgA<sup>+</sup> inherited from CF10237, screening for co-inheritance of the *del(relA)256* allele by the SMG test, described under Experimental Procedures.
- <sup>n</sup> P1 transduction of *del(spoT)207::cat* from CF1693, selecting for chloramphenicol resistance.
- <sup>o</sup> P1 transduction of *zib563::Tn10* from CF12271 (*spoT202*) or CF12275 (*spoT203*), selecting for tetracycline resistance and screening for coinheritance of *spoT202* or *spoT203*, indicated by chloramphenicol sensitivity (if the recipient strain is *del(spoT)207::cat*) or by a small colony phenotype. Inheritance of the *spoT* allele was verified by sequencing.
- <sup>p</sup> The parent strain was transformed with the indicated plasmid, selecting for spectinomycin resistance.
- <sup>q</sup> P1 transduction of the *del(relA)251::kan* allele from CF1693, selecting for kanamycin resistance.
- <sup>r</sup> The *priA300* allele from SS97 was introduced as previous described (Madison *et al.*, 2012).

<sup>s</sup>P1 transduction of *del(priC)752::kan* from JW0456-1, selecting for kanamycin resistance.

<sup>t</sup>The *del(priB)302* allele was introduced from JC19272 as previously described (Sandler *et al.*, 1999).

<sup>u</sup>The *<nusAinfB(wt)cat>*, *<nusAinfB(del1)cat>*, or *<nusAinfB(del2/3)cat>* from GTN1050, GTN1114, or GTN1115, respectively, was introduced by P1 transduction, selecting for chloramphenicol resistance. The *del(argG)781::kan* allele from JW3140-5 was then introduced, selecting for kanamycin resistance and screening for arginine auxotrophy. Finally, the strain was transduced to ArgG<sup>+</sup>, inherited from GTN1050, screening for co-inheritance of *del(infB)1::tet*.

<sup>v</sup>The *del(argG)781::kan* allele from JW3140-5 was introduced by P1 transduction, screening for tetracycline resistance and the retention of the *del(infB)1::tet* allele.

<sup>w</sup>The construction was conducted in three stages: *i*) replacement of the *del(spoT)207::cat* allele with the markerless *del(spoT)212* allele; *ii*) introduction of *<nusAinfB(wt)cat>*, *<nusAinfB(del1)cat>*, or *<nusAinfB(del2/3)cat>* from GTN1050, GTN1114, or GTN1115, respectively; and *iii*) the *del(infB)::tet* allele was introduced. In the first stage, the *zib563::Tn10* was introduced by P1 transduction, selecting for tetracycline resistance and screening for co-inheritance of *pyrE60* (pyrimidine auxotrophy). The resulting strain was transduced to PyrE<sup>+</sup>, inherited from CF10237. Transductants were screened for loss of chloramphenicol resistance, and the *del(spoT)212* allele was confirmed by PCR analysis. In the second stage, the *<nusAinfBcat>* allele was introduced by P1 transduction, selecting for chloramphenicol resistance. In the third stage, the *del(argG)781::kan* from GTN1461 was transduced, selecting for tetracycline resistance and screening for co-inheritance of the *del(infB)::tet* allele. Tetracycline resistance from this allele is not robust enough for direct selection. The presence of the allele was also verified by PCR analysis described previously (Madison *et al.*, 2012).

<sup>x</sup>The *<nusAinfB(wt)cat>*, *<nusAinfB(del1)cat>*, or *<nusAinfB(del2/3)cat>* was introduced from GTN1050, GTN1114, or GTN1115, respectively, selecting for chloramphenicol resistance. The *del(infB)1::tet* was co-transduced with *del(argG)781::kan* from GTN1461 as described under note *w*.

<sup>y</sup>Same as note *u* except that the *del(infB)::tet* allele was introduced from GTN1461 by co-transduction with *del(argG)781::kan*, selected by kanamycin resistance.

<sup>z</sup>The parent strain was transformed with the indicated plasmid, selecting for spectinomycin resistance. The *del(infB)1::tet* allele from GTN1461 was introduced by co-transduction with *del(argG)781::kan*, selected by resistance to kanamycin.

## SI References

- Baba, T., T. Ara, M. Hasegawa, Y. Takai, Y. Okumura, M. Baba, K.A. Datsenko, M. Tomita, B.L. Wanner & H. Mori, (2006) Construction of Escherichia coli K-12 in-frame, single-gene knockout mutants: the Keio collection. *Mol Syst Biol* **2**: 1-11.
- Harinarayanan, R., H. Murphy & M. Cashel, (2008) Synthetic growth phenotypes of Escherichia coli lacking ppGpp and transketolase A (tktA) are due to ppGpp-mediated transcriptional regulation of tktB. *Mol Microbiol* **69**: 882-894.

- Madison, K.E., M.R. Abdelmeguid, E.N. Jones-Foster & H. Nakai, (2012) A new role for translation initiation factor 2 in maintaining genome integrity. *PLoS Genet* **8**: e1002648.
- Sandler, S.J., (2000) Multiple genetic pathways for restarting DNA replication forks in *Escherichia coli* K-12. *Genetics* **155**: 487-497.
- Sandler, S.J., K.J. Mariani, K.H. Zavitz, J. Coutu, M.A. Parent & A.J. Clark, (1999) *DnaC* mutations suppress defects in DNA replication and recombination functions in *priB* and *priC* double mutants in *E. coli* K-12. *Mol Microbiol* **34**: 91-101.
- Sarubbi, E., K.E. Rudd & M. Cashel, (1988) Basal ppGpp level adjustment shown by new *spoT* mutants affect steady state growth rates and *rrnA* ribosomal promoter regulation in *Escherichia coli*. *Mol Gen Genet* **213**: 214-222.
- Xiao, H., M. Kalman, K. Ikehara, S. Zemel, G. Glaser & M. Cashel, (1991) Residual guanosine 3',5'-bispyrophosphate synthetic activity of *relA* null mutants can be eliminated by *spoT* null mutations. *J Biol Chem* **266**: 5980-5990.
